# Supplementary material
Source: Springer Nature journal article supplement (https://www.springermedizin.de/resource/supplementary/12879_2012_2149_MOESM4_ESM.pdf/9443762)

S1 D

S1 C

S2 D

S2 C

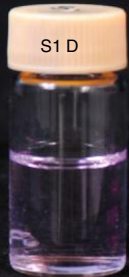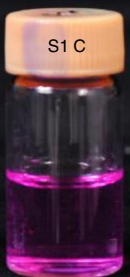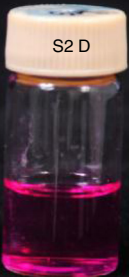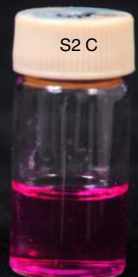

Supplement: MOESM4 [file 9443762]
